# Supplementary material for: SqueezeNet for the forecasting of the energy demand using a combined version of the sewing training-based optimization algorithm
Source: PubMed Central journal article supplement (PMC10360951; doi:10.1016/j.heliyon.2023.e16827), 2023-06-03
Supplement: mmc1.pdf [file mmc1.pdf]

### Form to confirm authorship changes for *Heliyon*

This form must be **signed by all authors** when there is a change in authorship which includes changes to any of the following items: author name(s), order of the authors, the corresponding author(s), the addition of authors, the removal of authors and changes in affiliation.

By personally signing this note, **all** authors confirm that: I) the changes are in accordance with their scientific contribution, II) they agree with all the changes and III) confirm that the authorship list conforms to the authorship criteria outlined on [Heliyon's ethics page](#). IV) it is the responsibility of the corresponding author to get the signature from all co-authors accepting the change. In case of any ethic violation/ malpractice in the signature, the corresponding author is accountable. The completed form should be returned along with the final/revised manuscript to proceed further with the manuscript. Manuscripts for which incomplete forms have ~~been submitted will be~~ rejected within 5 working days.

Any disputes on the authorship list and contributions need to be resolved by the involved scientists and *Heliyon* will only proceed with the evaluation of the manuscript once we receive confirmation, through this form, that such an agreement between the authors has been reached.

**Manuscript number:** HELIYON-D-23-03601

**Article title:** SqueezeNet for the forecasting of the energy demand using a Combined version of Sewing Training-Based Optimization Algorithm

**Complete new author list:** Noradin Ghadimi, Elnazossadat Yasoubi, Ehsan Akbari, Mohammad Hosein Sabzalian, Hamzah Ali Alkhazaleh, Mojtaba Ghadamyari

**Date:** 2023/05/05

| # | First name | Last name | Order change (Y/N) | Addition / Deletion | Change in Author name (Y/N) | Affiliation Change (Y/N) | Reason for the change | Signature                                                                             |
|---|------------|-----------|--------------------|---------------------|-----------------------------|--------------------------|-----------------------|---------------------------------------------------------------------------------------|
| 1 | Noradin    | Ghadimi   | N                  | ---                 | N                           | N                        | -----                 |  |

|   |                 |            |   |          |   |   |                                                                                                                                                                                                                                                                                                                                                                                                      |                                                                                       |
|---|-----------------|------------|---|----------|---|---|------------------------------------------------------------------------------------------------------------------------------------------------------------------------------------------------------------------------------------------------------------------------------------------------------------------------------------------------------------------------------------------------------|---------------------------------------------------------------------------------------|
| 2 | Elnazossadat    | Yasoubi    | Y | Addition | Y | N | Elnazossadat Yasoubi formulated the proposed concept, did the analysis and computations, and checked the final text. Elnazossadat Yasoubi also promoted and oversaw the outcomes of this research. Elnazossadat Yasoubi discussed the findings and helped to write the final article.                                                                                                                |    |
| 3 | Ehsan           | Akbari     | Y | Addition | Y | N | Ehsan Akbari carried out the study's review. Ehsan Akbari wrote the manuscript with the assistance of the other authors. Ehsan Akbari also assisted with project supervision. Ehsan Akbari oversaw the project by coming up with the initial idea.                                                                                                                                                   |    |
| 4 | Mohammad Hosein | Sabzalian  | Y | Addition | Y | N | Mohammad Hosein Sabzalian conceived and planned the survey technique. He planned and carried out the checking statistics and contributed to sample preparation. It contributed to the interpretation of the results. Dr. Mohammad Hosein Sabzalian took the lead in writing the manuscript, although, all authors provided critical feedback and helped shape the research, analysis and manuscript. |    |
| 5 | Hamzah Ali      | Alkhazaleh | Y | Addition | Y | N | Hamzah Ali Alkhazaleh: Help me in all steps of paper editing, improving the results in both figures and tables, paper writing updating, and also answering the reviewer's comments.                                                                                                                                                                                                                  |   |
| 6 | Mojtaba         | Ghadamyari | Y | Addition | Y | N | Hamzah Ali Alkhazaleh: Help me in all steps of paper editing, improving the results in both figures and tables, paper writing updating, and also answering the reviewer's comments.                                                                                                                                                                                                                  |  |
